# Supplementary material for: Timescales of emergence of chronic nuisance flooding in the major economic centre of Guadeloupe
Source: Copernicus journal article supplement (doi:10.5194/nhess-2020-178), 2020-08-17
Supplement: Supplementary file [file nhess-2020-178-RC1-supplement.pdf]

Review of

Timescales of emergence of chronic nuisance flooding ... in Guadeloupe

For 'Natural Hazards and Earth System Sciences'

This is an excellent paper, well worth publishing. Its main strength is in showing how precise data about specific-site futures can be obtained and used for planning purposes. This approach deserves to be much emulated.

I have many small comments that should be addressed in revision.

**Title:** I don't know why 'nuisance' is in the title – it is not mentioned in the Introduction – in fact not until section 3.5, then it is not defined. Also is "chronic nuisance" a contradiction? Should it be "chronic/nuisance"?

Line 19 – lowest not smallest

Line 20 – is not are – maybe the entire manuscript would benefit from being read for clarity.

Line 21 – this However can be substituted for Yet – However is a clumsy word – the text would benefit from having the word However taken out wherever it is used.

Line 69 – island names are repeated

Line 88 – seem not seems

Line 127 – delete height

Line 129 – this sentence is fine but add the point that such 'conversion' is highly unlikely to happen

Line 175 – identify not upraise

Line 183 – perhaps not presumably

Line 221 – datasets

Line 228 – change 'meter' to 'horizontal meters'

Line 233 – define nuisance flooding

Line 254 – will everyone know what subduction earthquakes are? Perhaps add 'low-angle thrust' in brackets?

Line 326 – I don't understand how the 100-year return figure can be helpful in a subsiding context – surely the point is that the 100-year surge will now become a 20-year one?

Line 349- remainder

Line 364 – some more information about the groundwater rise and stormwater runoff would be helpful

Line 383 – chronic flooding

Line 385 – years

Line 395 – explain why this should be a challenge (don't just imply it will)

Line 405 – flooding events – and ‘challenge’ not ‘game changer’

Line 429 – what are these non-cyclonic waves? Tsunamis? Elaborate

Line 436 – change ‘just’ to ‘anything between’

Line 436 – delete regional

Line 442 – before rapid add ‘expected’

Line 443 – change ‘centimeter allows to buy’ to ‘centimeters buys’

Line 448 – what sort of new infrastructure? More details would be of interest to readers. What about floating port facilities?

Line 449 – change area to areas and add citation to (Kumar and Taylor 2015)

Kumar, L., and S. Taylor. 2015. "Exposure of coastal built assets in the South Pacific to climate risks."  
*Nature Climate Change* 5 (11):992-+.
